# 1 **Virological traits of the SARS-CoV-2 BA.2.87.1 lineage**

2

3 Lu Zhang<sup>1,2</sup>, Alexandra Dopfer-Jablonka<sup>3,4</sup>, Inga Nehlmeier<sup>1</sup>, Amy Kempf<sup>1,2</sup>, Luise  
4 Graichen<sup>1,2</sup>, Noemí Calderón Hampel<sup>3</sup>, Anne Cossmann<sup>3</sup>, Metodi V. Stankov<sup>3</sup>, Gema Morillas  
5 Ramos<sup>3</sup>, Sebastian R. Schulz<sup>5</sup>, Hans-Martin-Jäck<sup>5</sup>, Georg M. N. Behrens<sup>3,4,6</sup>, Stefan  
6 Pöhlmann<sup>1,2</sup> and Markus Hoffmann<sup>1,2\*</sup>

7

8 <sup>1</sup>Infection Biology Unit, German Primate Center – Leibniz Institute for Primate Research,  
9 Göttingen, Germany.

10 <sup>2</sup>Faculty of Biology and Psychology, Georg-August-University Göttingen, Göttingen,  
11 Germany.

12 <sup>3</sup>Department of Rheumatology and Immunology, Hannover Medical School, Hannover,  
13 Germany.

14 <sup>4</sup>German Center for Infection Research (DZIF), partner site Hannover-Braunschweig,  
15 Hannover, Germany.

16 <sup>5</sup>Division of Molecular Immunology, Department of Internal Medicine 3, Friedrich-Alexander  
17 University of Erlangen-Nürnberg, Erlangen, Germany.

18 <sup>6</sup>Center for Individualized Infection Medicine (CiiM), Hannover, Germany.

19 \*Corresponding author: Markus Hoffmann, Infection Biology Unit, German Primate Center  
20 Center – Leibniz Institute for Primate Research, Göttingen, Germany; E-Mail:  
21 [mhoffmann@dpz.eu](mailto:mhoffmann@dpz.eu)

## 22 **Abstract**

23           **The highly mutated SARS-CoV-2 BA.2.87.1 lineage was recently detected in South**  
24 **Africa, but its transmissibility is unknown. Here, we report that BA.2.87.1 efficiently**  
25 **enters human cells but is more sensitive to antibody-mediated neutralization than the**  
26 **currently dominating JN.1 variant. Acquisition of adaptive mutations might thus be**  
27 **needed for high transmissibility.**

28

## 29 **Main text**

30           The emergence and rapid global dominance of the highly mutated Omicron variant in  
31 2021 and its sublineage JN.1 (a derivative of BA.2.86) in 2023 reveals that novel, antigenically  
32 distinct variants can rapidly reshape the now fading COVID-19 pandemic. At the end of 2023,  
33 a novel SARS-CoV-2 lineage, BA.2.87.1, was detected in eight patients in South Africa and  
34 one traveler entering the USA. The BA.2.87.1 lineage harbors 65 mutations in the spike (S)  
35 protein (relative to the virus that circulated in Wuhan in early 2020 (Figure 1A)), which  
36 facilitates viral entry into cells and constitutes the key target for neutralizing antibodies.  
37 However, it is unknown whether these mutations are compatible with robust entry into human  
38 cells and allow for efficient antibody evasion. We addressed these questions using pseudovirus  
39 particles (pp) bearing the SARS-CoV-2 S protein, which adequately model key aspects of  
40 SARS-CoV-2 entry into host cells and antibody-mediated neutralization (1). Besides particles  
41 bearing BA.2.87.1 S (BA.2.87.1<sub>pp</sub>), we included particles pseudotyped with the S proteins of  
42 the B.1 lineage (B.1<sub>pp</sub>), which circulated early in the pandemic, the XBB.1.5 lineage  
43 (XBB.1.5<sub>pp</sub>), which served as the target lineage for adaptation of the latest COVID-19 mRNA  
44 vaccines (2), and the currently prevailing JN.1 lineage (JN.1<sub>pp</sub>). All S proteins were efficiently  
45 processed and incorporated into particles (Figure 1B).

46

#### 47 **BA.2.87.1 efficiently enters and fuses human cells**

48 All particles efficiently entered a panel of six cell lines (Figure 1C). BA.2.87.1<sub>pp</sub> entered  
49 293T (human, kidney), Huh-7 (human, liver), LoVo (human, colon) and Vero cells (African  
50 green monkey, kidney, ± S protein-priming protease TMPRSS2) with similar efficiency as  
51 B.1<sub>pp</sub> and JN.1<sub>pp</sub>, except for 293T and LoVo cells, which were more susceptible to JN.1<sub>pp</sub>. For  
52 Calu-3 cells (human, lung), entry of B.1<sub>pp</sub> was highest, followed by JN.1<sub>pp</sub>, whereas XBB.1.5<sub>pp</sub>  
53 and BA.2.87.1<sub>pp</sub> entry was less efficient.

54 The ability of the S protein to fuse infected with uninfected cells is believed to contribute  
55 to COVID-19 pathogenesis (4-6), which is why we assessed the capacity of BA.2.87.1 S to  
56 drive cell-cell fusion using a split beta-galactosidase reporter assay (Figure 1D and  
57 Supplementary figure 1C). BA.2.87.1 S displayed significantly higher cell-cell fusion capacity  
58 than XBB.1.5 S and JN.1 S, reaching levels observed for B.1 S protein.

59

#### 60 **BA.2.87.1 efficiently utilizes human and animal ACE2 as entry receptors**

61 Next, we analyzed the ability of BA.2.87.1 S to engage the SARS-CoV-2 receptor  
62 ACE2 and found that BA.2.87.1 S and XBB.1.5 S bound soluble human ACE2 with comparable  
63 efficiency while ACE2 binding of B.1 S and JN.1 S was significantly reduced (Figure 1E).  
64 However, antibody-mediated of ACE2 engagement did not reveal major differences in ACE2  
65 dependency for cell entry by the different S proteins (Figure 1F). Moreover, all four S proteins  
66 could comparably utilize diverse mammalian ACE2 orthologues as entry receptors, with the  
67 exception of pangolin ACE2 (highest for B.1<sub>pp</sub>) and mouse efficiency (lowest for B.1<sub>pp</sub>) (Figure  
68 1G). Thus, the BA.2.87.1 lineage efficiently binds human ACE2 and robustly enters and fuses  
69 human cells, although entry into Calu-3 lung cells is reduced compared to JN.1.

70

#### 71 **Lung cell entry of BA.2.87.1 depends on TMPRSS2**

72 Most Omicron sublineages show a reduced capacity to employ TMPRSS2 for cell entry,  
73 which has been linked to diminished lung cell entry and reduced virulence (8-10). Therefore,  
74 we evaluated the dependency of BA.2.87.1<sub>pp</sub> on TMPRSS2 for lung cell entry using the  
75 cathepsin L inhibitor MDL28170 and the TMPRSS2 inhibitor camostat mesylate (Figure 1H).  
76 MDL28170 reduced Vero kidney cell entry of all particles analyzed but had no impact on Calu-  
77 3 lung cell entry of B.1<sub>pp</sub>, JN.1<sub>pp</sub> and BA.2.87.1<sub>pp</sub>, while XBB.1.5<sub>pp</sub> entry into lung Calu-3 cells  
78 was diminished. Camostat mesylate inhibited Calu-3 cell entry of all particles, with entry of  
79 B.1<sub>pp</sub>, JN.1<sub>pp</sub> and BA.2.87.1<sub>pp</sub> being more affected than entry of XBB.1.5<sub>pp</sub>. Finally, neither of  
80 the inhibitors reduced entry of control particles bearing the vesicular stomatitis virus  
81 glycoprotein (VSV-G). Thus, BA.2.78.1 deviates from other Omicron sublineage in its ability  
82 to efficiently employ TMPRSS2 for lung cell entry.

83

#### 84 **Few therapeutic monoclonal antibodies neutralize BA.2.87.1**

85 Recombinant monoclonal antibodies (mAb) have been successfully used for COVID-  
86 19 therapy but contemporary SARS-CoV-2 lineages developed resistance against most or all of  
87 them (11). Using a panel of twelve mAbs that were previously approved for COVID-19 therapy  
88 or are currently under development, we found that five of them (Casirivimab, Tixagevimab,  
89 Amubarvimab, Regdanvimab and Sotrovimab), displayed neutralizing activity against  
90 BA.2.87.1<sub>pp</sub> and should constitute suitable treatment options (Figure 2A-B and Supplementary  
91 figure 2). In comparison, only Sotrovimab was effective against XBB.1.5<sub>pp</sub> and none of the  
92 mAbs neutralized JN.1<sub>pp</sub>.

93

#### 94 **Less neutralization evasion by BA.2.87.1 compared to JN.1**

95 Finally, we studied the sensitivity of BA.2.87.1 to neutralization by antibodies induced  
96 upon vaccination or vaccination plus breakthrough infection. Cohorts 1 and 2 included

97 participants who recently received the XBB.1.5-adapted COVID-19 mRNA vaccine from  
98 BioNTech (raxtozinameran). Members of cohort 1 had no history of SARS-CoV-2 infection  
99 while members of cohort 2 had documented SARS-CoV-2 infection between 01/2022 and  
100 03/2023. Cohorts 3 and 4 included participants without XBB.1.5-booster vaccination, who  
101 experienced one (cohort 3) or two (cohort 4) SARS-CoV-2 infections with the most recent  
102 infection occurring during the JN.1 wave. Of note, all participants received at least four  
103 vaccinations with non-XBB.1.5-adapted COVID-19 vaccines and plasma samples were  
104 collected within three months after the last infection or vaccination (Supplementary table 1 and  
105 Supplementary figure 3). For all four cohorts, highest neutralizing activity was measured for  
106 B.1<sub>pp</sub> (geometric mean titer = 2797-7289), while neutralization of JN.1<sub>pp</sub> was lowest (~5-17-  
107 fold reduction compared to B.1<sub>pp</sub>) with the exception of cohort 4 (Figure 2C and Supplementary  
108 figure 4). Importantly, although BA.2.87.1<sub>pp</sub> displayed substantial resistance to antibody-  
109 mediated neutralization independent of the cohort analyzed, neutralization evasion was less  
110 efficient compared to JN.1<sub>pp</sub>, with the exception of cohort 4.

111

## 112 **Discussion**

113 Our initial virological assessment of the BA.2.87.1 lineage revealed that it efficiently  
114 utilizes human and animal ACE2 orthologues as receptors, and robustly enters human cell lines.  
115 However, cell entry of BA.2.87.1<sub>pp</sub> was found to be reduced compared JN.1<sub>pp</sub>. Calu-3 lung cell  
116 entry of BA.2.87.1<sub>pp</sub> was highly dependent on the cellular serine protease TMPRSS2, a trait  
117 that is shared with lineages dominating the pre-Omicron era and the recently emerged BA.2.86  
118 lineage (11). With respect to antibody-mediated neutralization, we found that BA.2.87.1 can be  
119 neutralized by Casirivimab, Tixagevimab, Amubarvimab, Regdanvimab and Sotrovimab,  
120 which could constitute suitable treatment options in case of BA.2.78.1 spread. In addition,  
121 BA.2.87.1<sub>pp</sub> evaded neutralization by antibodies present in the plasma of individuals with

122 diverse immune backgrounds but antibody evasion was reduced compared to JN.1<sub>pp</sub>. Based on  
123 the data obtained in this study it seems unlikely that BA.2.87.1 will efficiently spread in regions  
124 where JN.1 is dominant. However, BA.2.87.1 may still be able to spread in locations where  
125 JN.1 prevalence is low and may acquire additional mutations that improve transmissibility  
126 and/or immune evasion.

127       Limitations of our study include the lack of data for authentic SARS-CoV-2 lineages  
128 and small sample sizes of the cohorts, with the latter precluding an analysis of the impact of  
129 biological factors (e.g. age, sex, comorbidities, etc.) on neutralization. Nevertheless, this study  
130 provides valuable information on the virological traits of the BA.2.87.1 lineage that support  
131 political decision makers and medical personnel to determine whether changes in containment  
132 and treatment strategies are required.

133

## 134 **Acknowledgements**

135 We gratefully acknowledge the originating laboratories responsible for obtaining the  
136 specimens, as well as the submitting laboratories where the genome data were generated and  
137 shared via GISAID, on which this research is based. We further thank Roberto Cattaneo,  
138 Stephan Ludwig, Andrea Maisner, Stuart G. Turville, and Gert Zimmer for providing reagents.  
139 Further, we thank the participants of the CoCo Study for their support and the entire CoCo  
140 study team, especially Luis Manthey and Anna Meinecke for help. S.P. acknowledges funding  
141 by the EU project UNDINE (grant agreement number 101057100), the COVID-19-Research  
142 Network Lower Saxony (COFONI) through funding from the Ministry of Science and Culture  
143 of Lower Saxony in Germany (14-76103-184, projects 7FF22, 6FF22, 10FF22) and the German  
144 Research Foundation (Deutsche Forschungsgemeinschaft, DFG; PO 716/11-1). L.Z.  
145 acknowledges funding by the China Scholarship Council (CSC) (202006270031). A.D.-J.  
146 acknowledges funding by the European Social Fund (ZAM5-87006761) and by the Ministry

147 for Science and Culture of Lower Saxony (Niedersächsisches Ministerium für Wissenschaft  
148 und Kultur; 14-76103-184, COFONI Network, project 4LZF23). H.-M.J. received funding  
149 from BMBF (01KI2043, NaFoUniMedCovid19-COVIM: 01KX2021), Bavarian State Ministry  
150 for Science and the Arts and Deutsche Forschungsgemeinschaft (DFG) through the research  
151 training groups RTG1660 and TRR130, the Bayerische Forschungstiftung (Project CORAd)  
152 and the Kastner Foundation. G.M.N.B. acknowledges funding by German Center for Infection  
153 Research (grant no 80018019238), the European Regional Development Fund Getting AIR  
154 (ZW7-85151373), and the Ministry for Science and Culture of Lower Saxony  
155 (Niedersächsisches Ministerium für Wissenschaft und Kultur; 14-76103-184, COFONI  
156 Network, project 4LZF23. The funding sources had no role in the design and execution of the  
157 study, the writing of the manuscript and the decision to submit the manuscript for publication.  
158 The authors did not receive payment by a pharmaceutical company or other agency to write the  
159 publication. The authors were not precluded from accessing data in the study, and they accept  
160 responsibility to submit for publication.

161

## 162 **Conflict of interest statement**

163 S.P. and M.H. performed contract research (testing of vaccinee sera for neutralizing activity  
164 against SARS-CoV-2) for Valneva unrelated to this work. A.D-J. served as advisor for Pfizer,  
165 unrelated to this work. G.M.N.B. served as advisor for Moderna, unrelated to this work. S.P.  
166 served as advisor for BioNTech, unrelated to this work. All other authors declare no competing  
167 interests.

168

## 169 **Ethical statement**

170 Plasma samples were collected as part of the COVID-19 Contact (CoCo) Study (German  
171 Clinical Trial Registry, DRKS00021152). The CoCo Study and the analysis performed for this

172 study were approved by the Internal Review Board of Hannover Medical School (institutional  
173 review board no. 8973\_BO-K\_2020, last amendment Sep 2023). All study participants  
174 provided written informed consent and received no compensation.

175

## 176 **Data availability**

177 Raw data are available upon request. This study did not generate code. All materials and  
178 reagents will be made available upon installment of a material transfer agreement.

179

## 180 **Authors' contributions**

181 Conceptualization: L.Z and M.H.; Methodology: S.P. and M.H.; Investigation: L.Z., I.N., A.K.,  
182 L.G., and M.H.; Formal analysis: L.Z., M.H., and M.V.S.; Resources: A.D.-J., N.C.H., A.C.,  
183 G.M.R., S.R.S, H.-M.J., and G.M.N.B.; Funding acquisition: A.D.-J., H.-M.J., G.M.N.B., and  
184 S.P.; Writing – original draft: M.H.; Writing – review & editing: all authors.



## 185 **References**

- 186 1. Schmidt F, Weisblum Y, Muecksch F, Hoffmann HH, Michailidis E, Lorenzi JCC, et  
187 al. Measuring SARS-CoV-2 neutralizing antibody activity using pseudotyped and chimeric  
188 viruses. *The Journal of experimental medicine*. 2020 Nov 2;217(11). PubMed PMID:  
189 32692348. Pubmed Central PMCID: 7372514.
- 190 2. Gayed J, Diya O, Lowry FS, Xu X, Bangad V, Mensa F, et al. Safety and  
191 Immunogenicity of the Monovalent Omicron XBB.1.5-Adapted BNT162b2 COVID-19  
192 Vaccine in Individuals  $\geq 12$  Years Old: A Phase 2/3 Trial. *Vaccines*. 2024 Jan 24;12(2).  
193 PubMed PMID: 38400102.
- 194 3. Hoffmann M, Kleine-Weber H, Schroeder S, Kruger N, Herrler T, Erichsen S, et al.  
195 SARS-CoV-2 Cell Entry Depends on ACE2 and TMPRSS2 and Is Blocked by a Clinically  
196 Proven Protease Inhibitor. *Cell*. 2020 Apr 16;181(2):271-80 e8. PubMed PMID: 32142651.  
197 Pubmed Central PMCID: 7102627.
- 198 4. Bussani R, Schneider E, Zentilin L, Collesi C, Ali H, Braga L, et al. Persistence of viral  
199 RNA, pneumocyte syncytia and thrombosis are hallmarks of advanced COVID-19 pathology.  
200 *EBioMedicine*. 2020 Nov;61:103104. PubMed PMID: 33158808. Pubmed Central PMCID:  
201 PMC7677597. Epub 20201103.
- 202 5. Braga L, Ali H, Secco I, Chiavacci E, Neves G, Goldhill D, et al. Drugs that inhibit  
203 TMEM16 proteins block SARS-CoV-2 spike-induced syncytia. *Nature*. 2021  
204 Jun;594(7861):88-93. PubMed PMID: 33827113. Pubmed Central PMCID: 7611055.
- 205 6. Rajah MM, Bernier A, Buchrieser J, Schwartz O. The Mechanism and Consequences  
206 of SARS-CoV-2 Spike-Mediated Fusion and Syncytia Formation. *J Mol Biol*. 2022 Mar  
207 30;434(6):167280. PubMed PMID: 34606831. Pubmed Central PMCID: PMC8485708. Epub  
208 20211001.
- 209 7. Qu P, Faraone JN, Evans JP, Zheng YM, Carlin C, Anghelina M, et al. Enhanced  
210 evasion of neutralizing antibody response by Omicron XBB.1.5, CH.1.1, and CA.3.1 variants.  
211 *Cell reports*. 2023 May 30;42(5):112443. PubMed PMID: 37104089. Pubmed Central PMCID:  
212 10279473.
- 213 8. Hui KPY, Ho JCW, Cheung MC, Ng KC, Ching RHH, Lai KL, et al. SARS-CoV-2  
214 Omicron variant replication in human bronchus and lung ex vivo. *Nature*. 2022  
215 Mar;603(7902):715-20. PubMed PMID: 35104836. Epub 20220201.
- 216 9. Shuai H, Chan JF, Hu B, Chai Y, Yuen TT, Yin F, et al. Attenuated replication and  
217 pathogenicity of SARS-CoV-2 B.1.1.529 Omicron. *Nature*. 2022 Mar;603(7902):693-9.  
218 PubMed PMID: 35062016. Epub 20220121.
- 219 10. Meng B, Abdullahi A, Ferreira I, Goonawardane N, Saito A, Kimura I, et al. Altered  
220 TMPRSS2 usage by SARS-CoV-2 Omicron impacts infectivity and fusogenicity. *Nature*. 2022  
221 Mar;603(7902):706-14. PubMed PMID: 35104837. Pubmed Central PMCID: 8942856.
- 222 11. Zhang L, Kempf A, Nehlmeier I, Cossmann A, Richter A, Bdeir N, et al. SARS-CoV-  
223 2 BA.2.86 enters lung cells and evades neutralizing antibodies with high efficiency. *Cell*. 2024  
224 Feb 1;187(3):596-608 e17. PubMed PMID: 38194966.

## 225 **Figure legends**

### 226 **Figure 1: Host cell entry properties of the SARS-CoV-2 BA.2.87.1 lineage.**

227 **(A)** S protein mutations of B.1, XBB.1.5, BA.2, JN.1 and BA.2.87.1 compared to the Wuhan-  
228 Hu-01 isolate. Abbreviations: NTD, N-terminal domain; RBD, receptor-binding domain, pre-  
229 S1/S2, region between RBD and S1/S2 cleavage site. **(B)** Processing and particle incorporation  
230 of the BA.2.87.1 S protein. Presented are representative data from a single biological replicate  
231 and results were confirmed in five additional biological replicates. **(C)** Entry efficiency of the  
232 BA.2.87.1 lineage. Pseudotype particles harboring the indicated S proteins were inoculated onto  
233 the indicated cell lines and entry was analyzed. Presented are mean data from six biological  
234 replicates, conducted with four technical replicates, with cell entry normalized against particles  
235 harboring the B.1 S protein (set as 1). Error bars represent the standard error of the mean (SEM).  
236 **(D)** Cell-cell fusion capacity of the BA.2.87.1 lineage. Presented are the mean data from four  
237 biological replicates, conducted with three technical replicates. Fusion driven by the B.1 S  
238 protein was set as 1. Error bars indicate the SEM. **(E)** Soluble human ACE2 binding by the  
239 BA.2.87.1 S protein. Presented are mean ACE2 binding data from six biological replicates,  
240 conducted with a single technical replicate, and ACE2 binding was corrected for S protein cell  
241 surface expression and normalized using the B.1 S protein as reference (= 1). Error bars indicate  
242 the SEM. **(F)** Impact of ACE2 blockade on cell entry of the BA.2.87.1 lineage. Pseudotype  
243 particles harboring the indicated S proteins were inoculated onto Vero cells that were  
244 preincubated with different concentration of an ACE2-blocking antibody and entry was  
245 analyzed. Presented are mean data from three biological replicates, conducted with four  
246 technical replicates, with cell entry in the absence of antibody used as reference (set as 100%).  
247 Error bars represent the SEM. **(G)** Utilization of mammalian ACE2 orthologues by the  
248 BA.2.87.1 lineage. Particles bearing the indicated S proteins were inoculated onto BHK-21  
249 cells expressing the indicated ACE2 orthologues following transfection and entry efficiency

250 was analyzed. Net plots present the mean data from three biological replicates, conducted with  
251 four technical replicates, and data were normalized to human ACE2 (set as 1). **(H)** Dependency  
252 of BA.2.87.1 lung cell entry on TMPRSS2. Pseudotype particles harboring the indicated S  
253 proteins were inoculated onto Vero and Calu-3 cells that were preincubated with MDL28170  
254 or camostat mesylate and entry was analyzed. Presented are mean data from three biological  
255 replicates, conducted with four technical replicates, with cell entry in the absence of inhibitor  
256 used as reference (set as 100%). Error bars represent the SEM. For panels C, D and E statistical  
257 significance was analyzed by two-tailed students' t-test with Welch correction, while for panels  
258 F and H, statistical significance was analyzed by two-way ANOVA with Dunnett's posttest ( $p$   
259  $> 0.05$ , not significant [ns];  $p \leq 0.05$ , \*;  $p \leq 0.01$ , \*\*;  $p \leq 0.001$ , \*\*\*)

260

261 **Figure 2: Neutralization sensitivity of the SARS-CoV-2 BA.2.87.1 lineage.**

262 **(A)** Sensitivity of the BA.2.87.1 lineage to neutralization by monoclonal antibodies (mAb).  
263 Pseudotype particles harboring the indicated S proteins were incubated with different  
264 concentrations of the indicated mAbs, before being inoculated onto Vero cells and cell entry  
265 was analyzed at 16–18 h post inoculation by measuring firefly luciferase activity in cell lysates.  
266 Presented are the mean data from three biological replicates, conducted with four technical  
267 replicates, and cell entry was normalized against entry in the absence of mAb (set as 0%  
268 inhibition). **(B)** Net plots indicate the effective dose 50 (EC50) values calculated from the data  
269 presented in panel A. **(C)** Sensitivity of the JN.1 lineage to neutralization by antibodies in the  
270 blood plasma of individuals with different immunization background. Pseudotype particles  
271 harboring the indicated S proteins were incubated with different dilutions of plasma, before  
272 being inoculated onto Vero cells and cell entry was analyzed at 16–18 h post inoculation by  
273 measuring firefly luciferase activity in cell lysates. Cell entry was further normalized against  
274 entry in the absence of plasma (set as 0% inhibition) and the neutralizing titer 50 values were

275 calculated based on a nonlinear regression model. Presented are the geometric mean titers  
276 (GMT) from a single biological replicate, conducted with four technical replicates. Information  
277 above the graphs include response rates (proportion of plasma samples with neutralizing  
278 activity), GMT values, and median fold GMT changes compared to particles bearing the B.1 S  
279 protein. Please also see Supplementary table 1 and supplementary figures 3 and 4 for additional  
280 information. Statistical significance was assessed by Wilcoxon matched-pairs signed rank test  
281 ( $p > 0.05$ , ns;  $p \leq 0.05$ , \*;  $p \leq 0.01$ , \*\*;  $p \leq 0.001$ , \*\*\*).

# Figure 1

A)

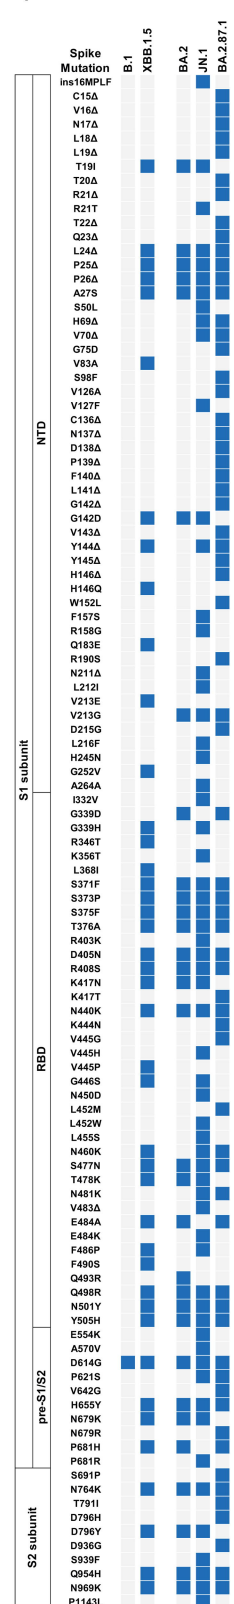

B)

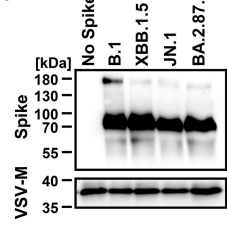

C)

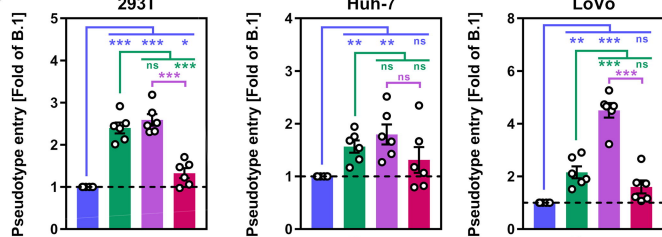

D)

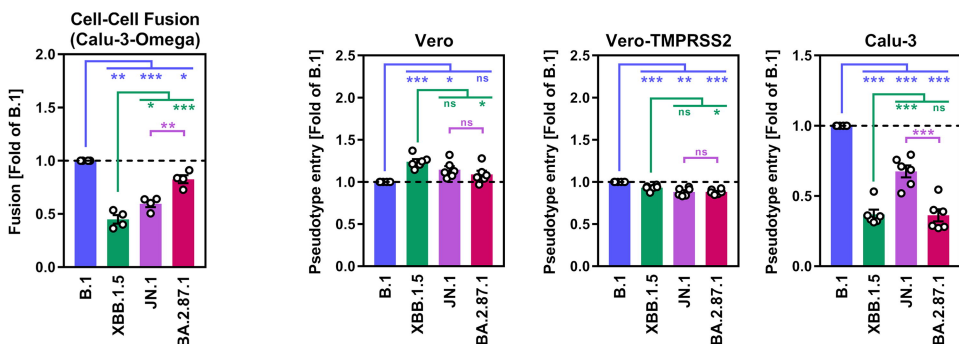

E)

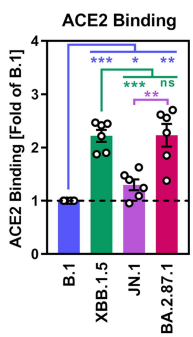

G)

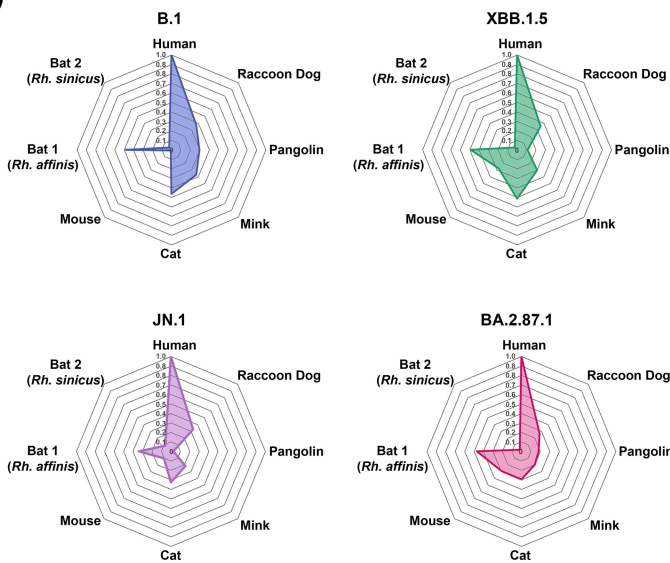

F)

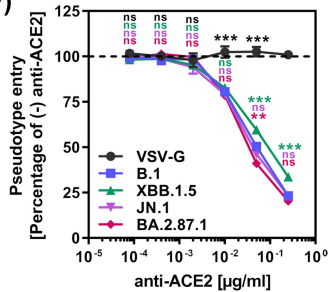

H)

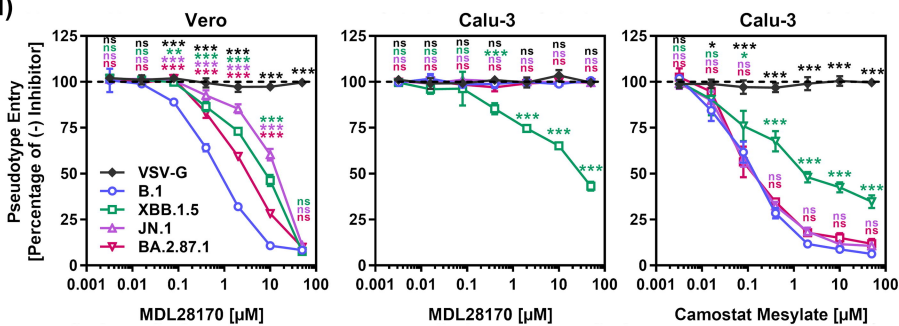

# Figure 2

A)

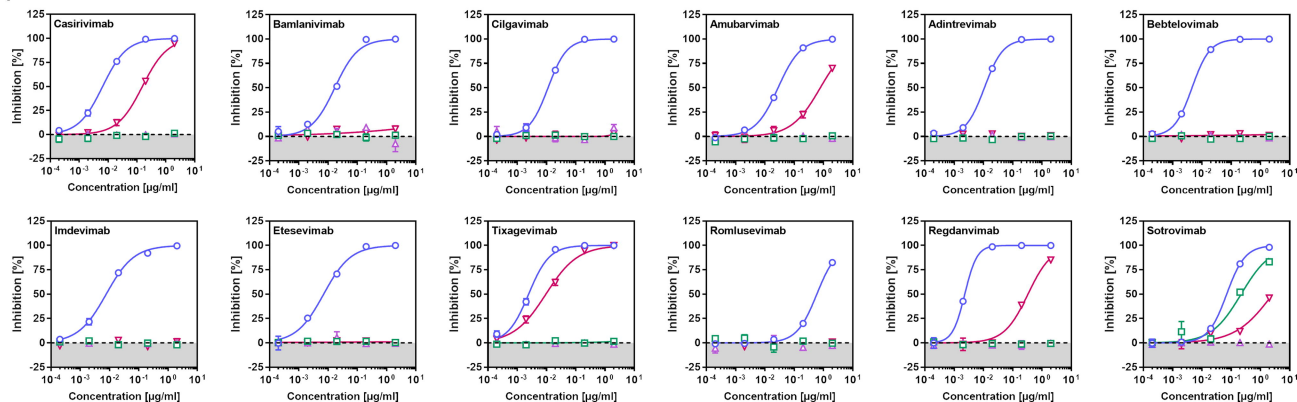

B)

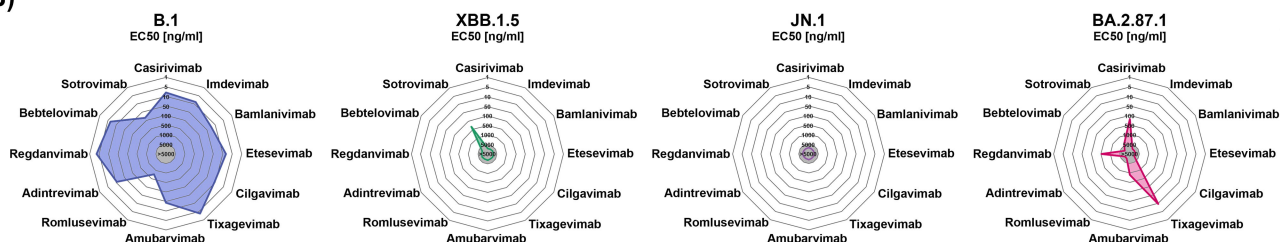

C)

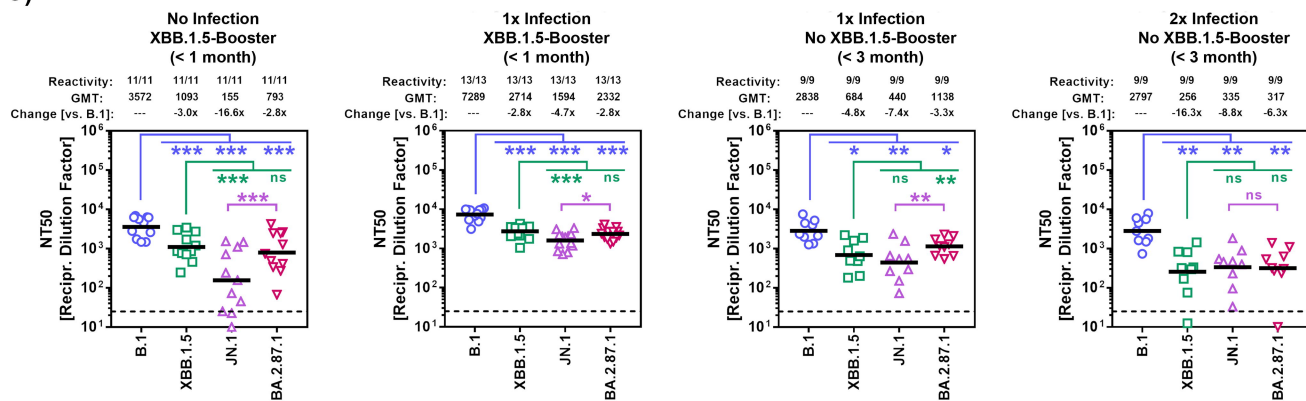

Source: https://www.biorxiv.org/content/biorxiv/early/2024/02/28/2024.02.27.582254.full.pdf
